# Supplementary material for: Genomic, Phylogenetic and Physiological Characterization of the PAH-Degrading Strain Gordonia polyisoprenivorans 135
Source: MDPI journal article supplement (doi:10.3390/biology13050339), 2024-05-13
Supplement: s1 [file s1]

**Figure S1.** Colony appearance of the strain *Gordonia polyisoprenivorans* 135

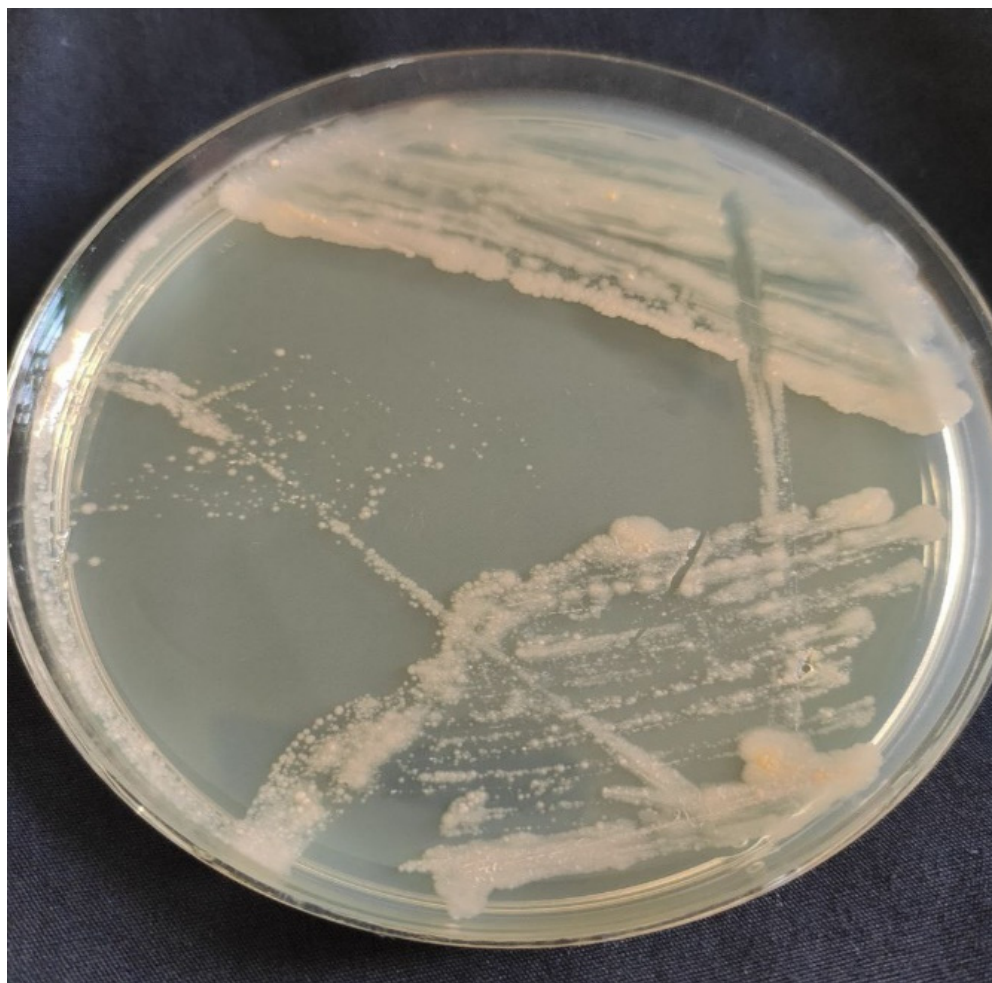

**Figure S2.** Circular genomic map of *G. polyisoprenivorans* 135 chromosome.

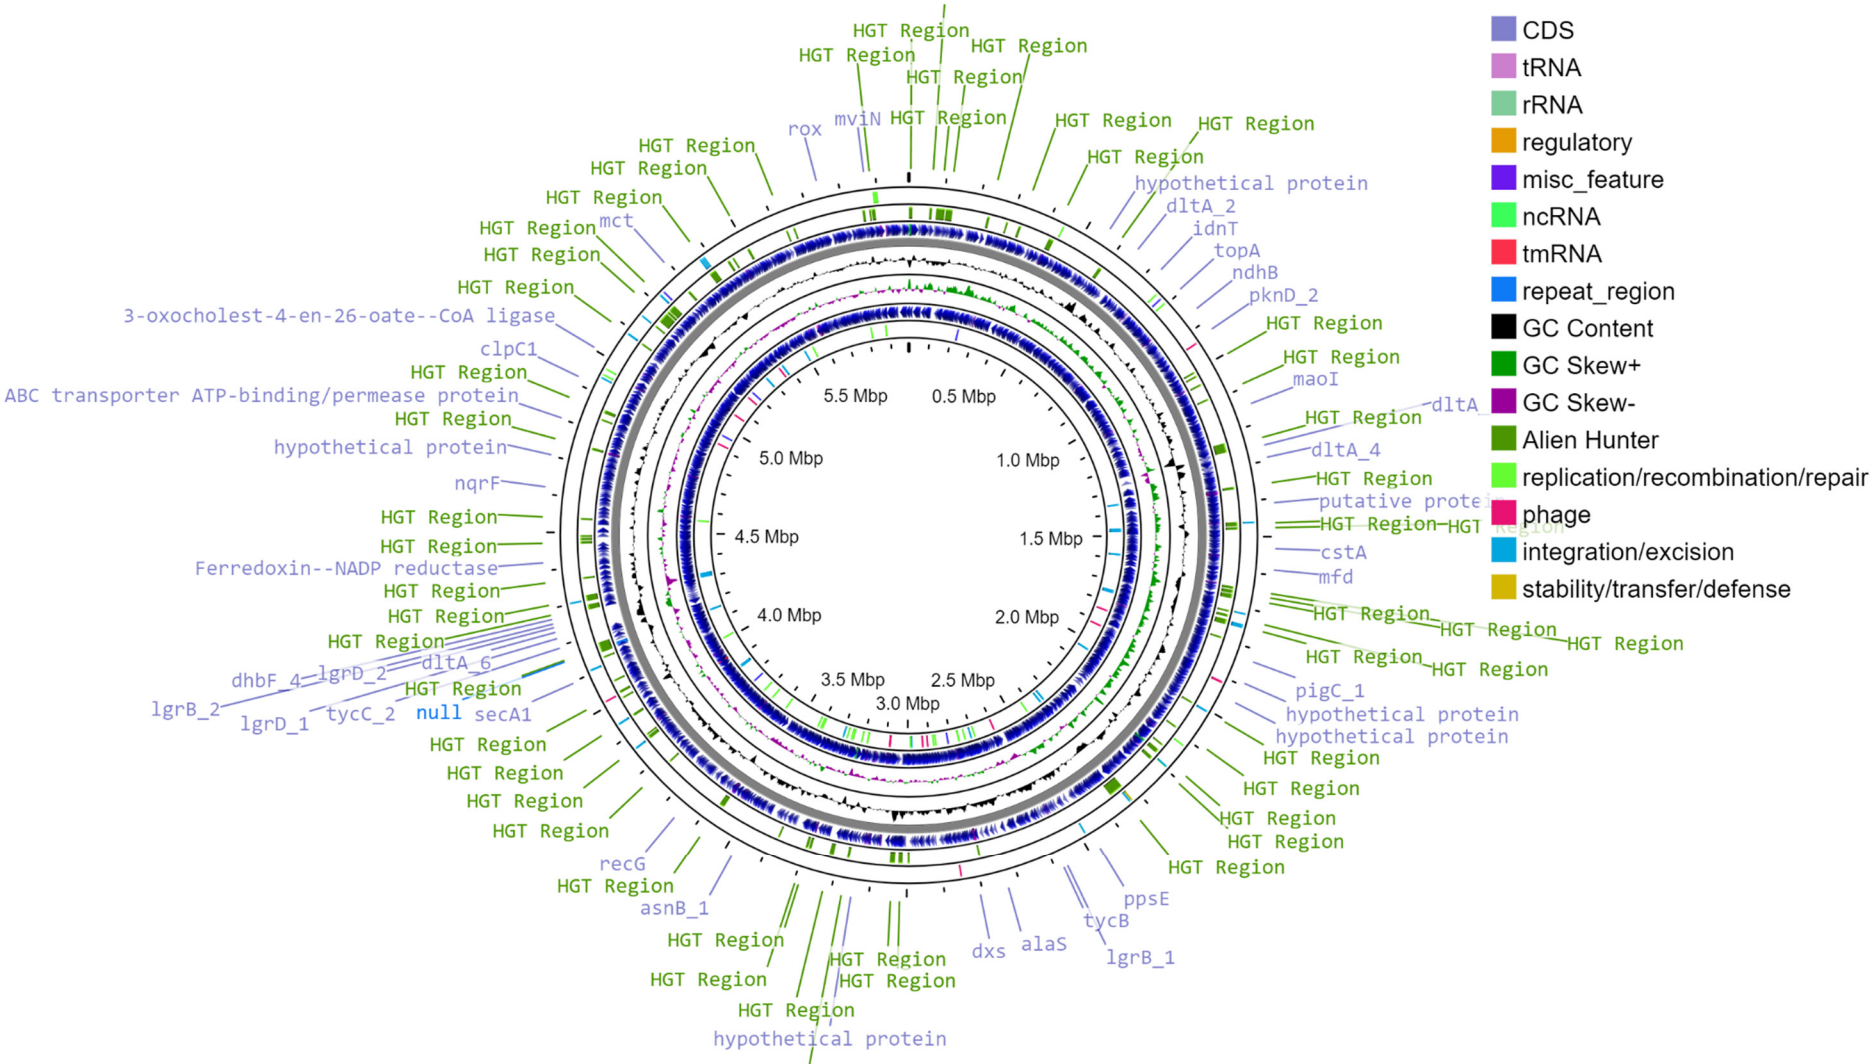

**Figure S3.** *Gordonia polyisoprenivorans* strains (a) 135, (b) C, (c) VH2 in pangenomic comparison. Tracks (from outside in): Forward genes (blue), Reverse genes (red), Core-genes (purple), Strain-specific genes (green), GC skew (black)

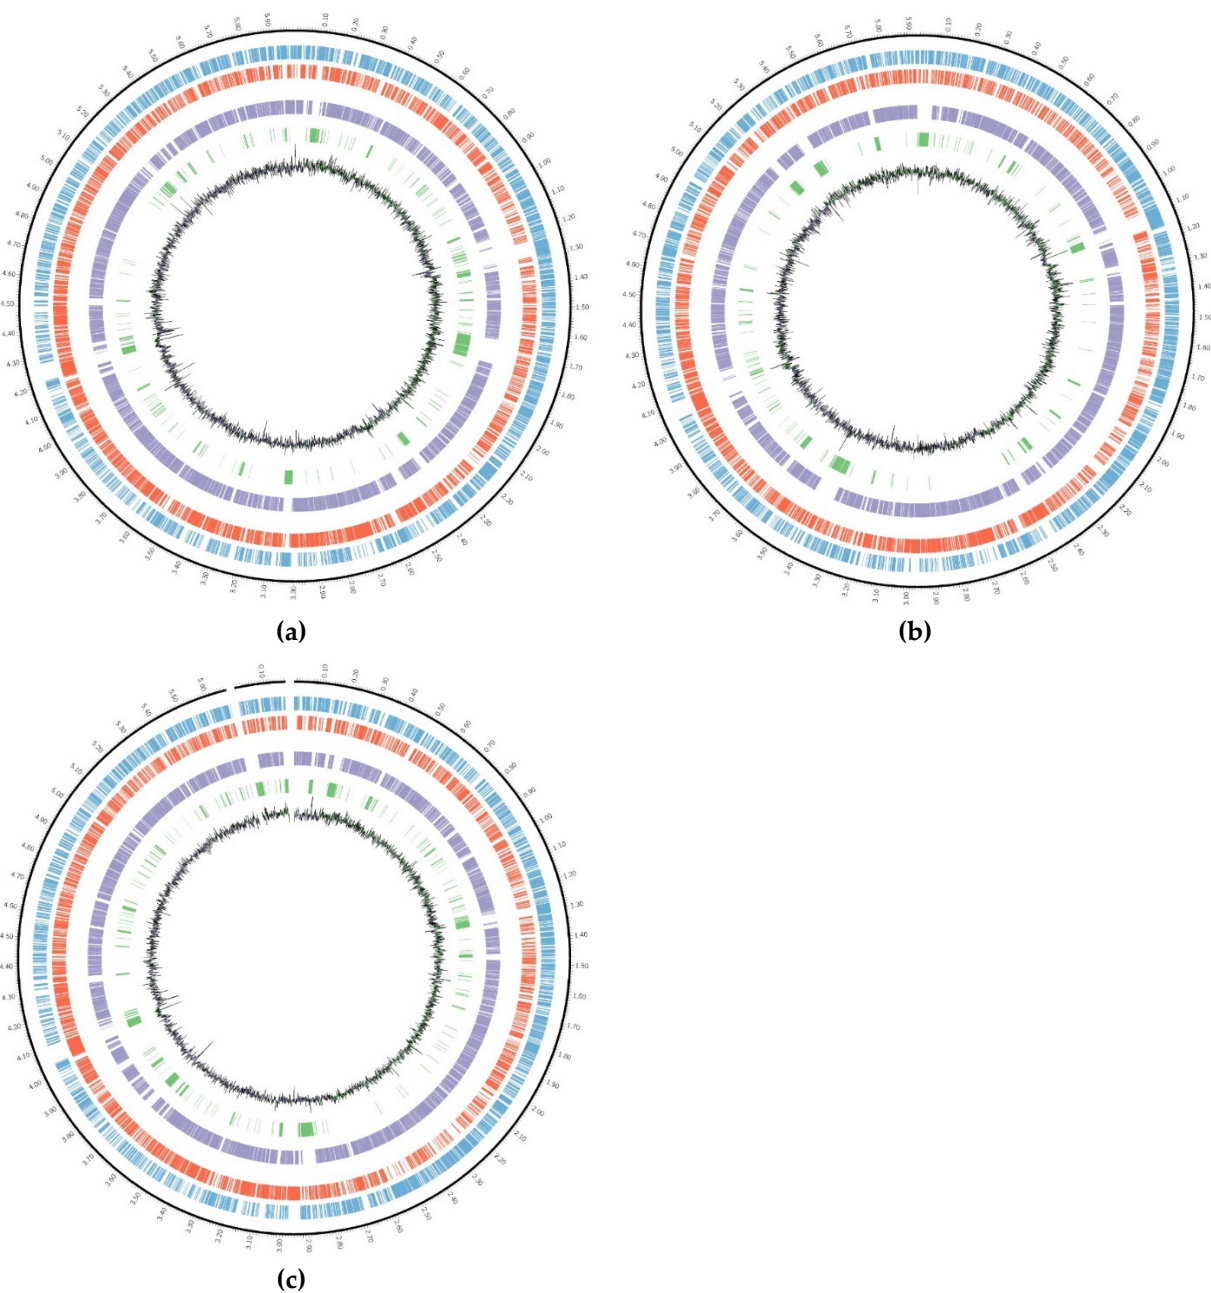

**Figure S4.** Distribution of COG functional categories.

INFORMATION STORAGE AND PROCESSING: [J] Translation, ribosomal structure and biogenesis, [A] RNA processing and modification, [K] Transcription, [L] Replication, recombination and repair, [B] Chromatin structure and dynamics

CELLULAR PROCESSES AND SIGNALING: [D] Cell cycle control, cell division, chromosome partitioning, [Y] Nuclear structure, [V] Defense mechanisms, [T] Signal transduction mechanisms, [M] Cell wall/membrane/envelope biogenesis, [N] Cell motility, [Z] Cytoskeleton, [W] Extracellular structures, [U] Intracellular trafficking, secretion, and vesicular transport, [O] Posttranslational modification, protein turnover, chaperones

METABOLISM: [C] Energy production and conversion, [G] Carbohydrate transport and metabolism, [E] Amino acid transport and metabolism, [F] Nucleotide transport and metabolism, [H] Coenzyme transport and metabolism, [I] Lipid transport and metabolism, [P] Inorganic ion transport and metabolism, [Q] Secondary metabolites biosynthesis, transport and catabolism

POORLY CHARACTERIZED: [R] General function prediction only, [S] Function unknown

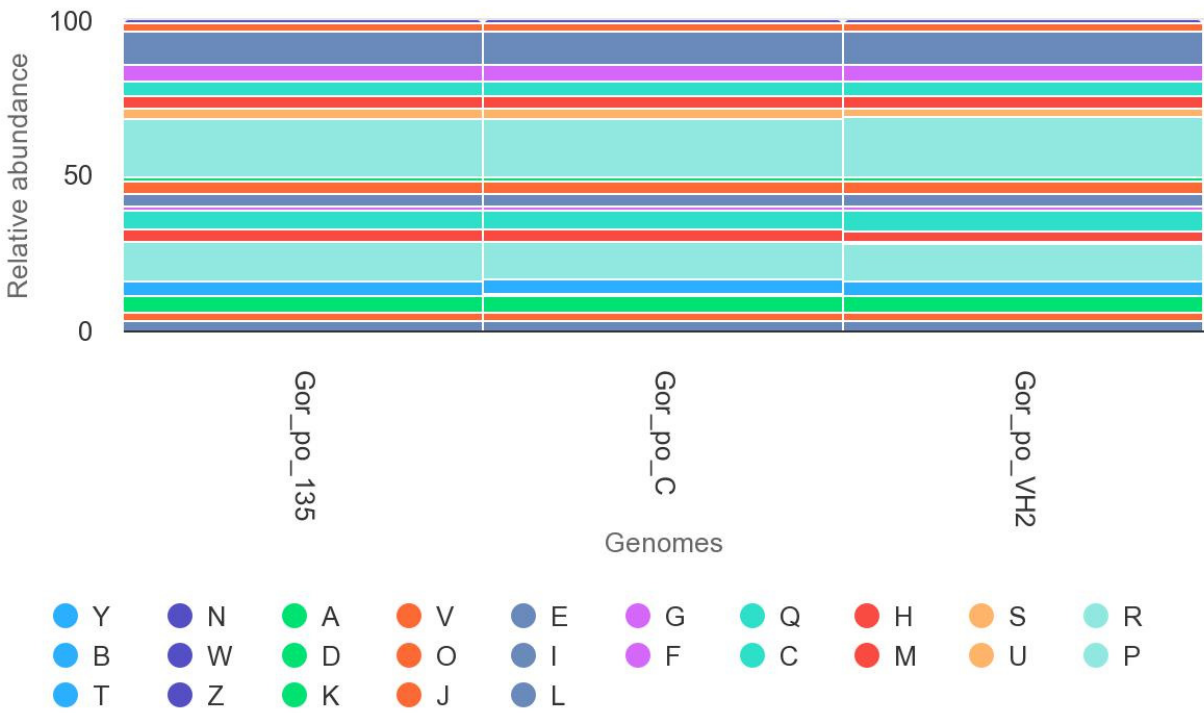

**Table S1.** List of genes unique for the strain *G. polyisoprenivorans* 135. COG category designations are given according to the legend in Figure S5. All hypothetical proteins and transposases have been removed from the list.

| Cluster     | Function                                               | COG                      | COG categories |
|-------------|--------------------------------------------------------|--------------------------|----------------|
| CLUSTER6226 | MaoC/PaaZ C-terminal domain-containing protein         | COG2030,COG3777          | S,I            |
| CLUSTER6223 | cation-translocating P-type ATPase                     | COG0560,COG2216,COG0546, | E,R,P          |
| CLUSTER6218 | serine protease                                        | #                        | #              |
| CLUSTER6216 | MarR family transcriptional regulator                  | COG1846                  | K              |
| CLUSTER6215 | MerR family transcriptional regulator                  | COG0789                  | K              |
| CLUSTER6211 | MarR family transcriptional regulator                  | COG0640,COG1321,COG1959, | K              |
| CLUSTER6210 | aromatic ring-hydroxylating dioxygenase subunit alpha  | COG2146,COG4638          | P              |
| CLUSTER6209 | AMP-binding protein                                    | COG0365,COG1541,COG1021, | Q,H,I          |
| CLUSTER6208 | LuxR C-terminal-related transcriptional regulator      | COG4566,COG2771,COG2203, | K,T            |
| CLUSTER6190 | DEAD/DEAH box helicase                                 | COG1204,COG4581,COG4098, | K,L,V,R        |
| CLUSTER6189 | CHAT domain-containing protein                         | COG4995                  | S              |
| CLUSTER6030 | SRPBCC family protein                                  | #                        | #              |
| CLUSTER6028 | metalloregulator ArsR/SmtB family transcription factor | COG3398,COG1654,COG1846, | K,S            |
| CLUSTER6024 | ATP-binding protein                                    | COG2256,COG2074,COG0714, | G,R,T,E,O,L    |
| CLUSTER6022 | DHA2 family efflux MFS transporter permease subunit    | COG0477,COG2814,COG2271  | G              |
| CLUSTER6017 | MFS transporter                                        | COG2211,COG2807,COG2814, | P,G            |
| CLUSTER6016 | non-heme iron oxygenase ferredoxin subunit             | COG0723,COG2146,COG4638  | C,P            |
| CLUSTER6015 | acyl-CoA dehydrogenase family protein                  | COG1960                  | I              |
| CLUSTER6014 | helix-turn-helix transcriptional regulator             | COG1595,COG2909,COG2771, | T,K            |
| CLUSTER6002 | helix-turn-helix domain-containing protein             | COG2207,COG4977          | K              |
| CLUSTER5887 | VOC family protein                                     | COG2514,COG0346          | R,E            |
| CLUSTER5885 | MATE family efflux transporter                         | COG0728,COG0534          | R,V            |
| CLUSTER5871 | amino acid adenylation domain-containing protein       | COG1020,COG0236,COG0318, | I,H,Q          |
| CLUSTER5866 | SGNH/GDSL hydrolase family protein                     | COG1835                  | I              |
| CLUSTER5861 | TlpA disulfide reductase family protein                | COG0526,COG3118          | O              |
| CLUSTER5854 | LCP family protein                                     | COG1316                  | K              |
| CLUSTER5852 | NADP-dependent alcohol dehydrogenase                   | COG0604,COG1062,COG1063, | R,C,E          |
| CLUSTER5851 | MspA family porin                                      | #                        | #              |



|             |                                                                   |                          |                       |
|-------------|-------------------------------------------------------------------|--------------------------|-----------------------|
| CLUSTER5847 | phosphatase PAP2 family protein                                   | #                        | #                     |
| CLUSTER5846 | DUF2834 domain-containing protein                                 | #                        | #                     |
| CLUSTER5841 | ABC transporter permease                                          | COG1079,COG4177,COG4214, | G,R,E                 |
| CLUSTER5840 | helix-turn-helix transcriptional regulator                        | COG2909,COG2522,COG4566, | K,T,R                 |
| CLUSTER5716 | thiamine permease                                                 | COG1457                  | F                     |
| CLUSTER5708 | fumarylacetoacetate hydrolase family protein                      | COG3970,COG0179          | R,Q                   |
| CLUSTER5706 | saccharopine dehydrogenase NADP-binding domain-containing protein | COG0300,COG3268,COG2910, | M,R,S,E               |
| CLUSTER5698 | MerR family transcriptional regulator                             | COG0789                  | K                     |
| CLUSTER5694 | DNA/RNA non-specific endonuclease                                 | #                        | #                     |
| CLUSTER5693 | amino acid adenylation domain-containing protein                  | COG1020,COG0318,COG0365, | Q,I                   |
| CLUSTER5690 | DNA cytosine-5--methyltransferase                                 | COG0270                  | L                     |
| CLUSTER5689 | acyltransferase                                                   | COG1835                  | I                     |
| CLUSTER5667 | enoyl-CoA hydratase-related protein                               | COG0447,COG1024          | H,I                   |
| CLUSTER5665 | MspA family porin                                                 | #                        | #                     |
| CLUSTER5663 | glycosyltransferase 87 family protein                             | #                        | #                     |
| CLUSTER5661 | ATP-binding cassette domain-containing protein                    | COG4555,COG4148,COG1116, | Q,H,C,O,E,D,R,V,G,L,P |
| CLUSTER5656 | LuxR family transcriptional regulator                             | COG2197,COG2771,COG4566, | K,T                   |
| CLUSTER5651 | ATP-dependent Clp protease proteolytic subunit                    | COG0616,COG1030,COG0740  | O                     |
| CLUSTER5533 | hydantoinase/oxoprolinase family protein                          | COG0145                  | E                     |
| CLUSTER5531 | AfsA-related hotdog domain-containing protein                     | #                        | #                     |
| CLUSTER5530 | NADP/FAD-dependent oxidoreductase                                 | COG0654,COG0644          | C,H                   |
| CLUSTER5523 | SDR family oxidoreductase                                         | COG4221,COG3967,COG0300, | R,M,I                 |
| CLUSTER5517 | beta-ketoacyl synthase N-terminal-like domain-containing protein  | COG0304,COG3321,COG0331  | Q,I                   |
| CLUSTER5511 | amino acid adenylation domain-containing protein                  | COG1022,COG1021,COG1541, | I,Q,H                 |
| CLUSTER5502 | very short patch repair endonuclease                              | COG3727                  | L                     |
| CLUSTER5487 | acyl-CoA dehydrogenase family protein                             | COG1960                  | I                     |
| CLUSTER5486 | AMP-binding protein                                               | COG0365,COG1021,COG1022, | I,Q                   |
| CLUSTER5482 | beta-16-N-acetylglucosaminyltransferase                           | #                        | #                     |
| CLUSTER5480 | LacI family DNA-binding transcriptional regulator                 | COG1879,COG1609          | G,K                   |
| CLUSTER5477 | DUF1266 domain-containing protein                                 | COG0515                  | R                     |

|             |                                                             |                          |                 |
|-------------|-------------------------------------------------------------|--------------------------|-----------------|
| CLUSTER5473 | HNH endonuclease                                            | COG1403                  | V               |
| CLUSTER5355 | transporter substrate-binding protein                       | COG0683                  | E               |
| CLUSTER5353 | AfsA-related hotdog domain-containing protein               | #                        | #               |
| CLUSTER5352 | TetR/AcrR family transcriptional regulator                  | COG1309                  | K               |
| CLUSTER5347 | cyclase family protein                                      | COG1878                  | R               |
| CLUSTER5342 | SDR family NADP-dependent oxidoreductase                    | COG1088,COG0236,COG1028  | M,I             |
| CLUSTER5338 | antibiotic biosynthesis monooxygenase                       | COG1359                  | S               |
| CLUSTER5337 | condensation domain-containing protein                      | COG1020,COG0318,COG0365, | I,Q,H           |
| CLUSTER5336 | thiamine pyrophosphate-binding protein                      | COG0028                  | E               |
| CLUSTER5321 | Abi family protein                                          | COG5520,COG4823          | M,V             |
| CLUSTER5320 | carboxymuconolactone decarboxylase family protein           | COG2128,COG0599          | S               |
| CLUSTER5316 | Fis family transcriptional regulator                        | #                        | #               |
| CLUSTER5312 | SDR family oxidoreductase                                   | COG1028,COG0623,COG0300, | I,R             |
| CLUSTER5311 | AMP-binding protein                                         | COG1020,COG0318,COG1021, | I,Q,H           |
| CLUSTER5307 | O-antigen ligase family protein                             | COG3307                  | M               |
| CLUSTER5303 | helix-turn-helix domain-containing protein                  | COG3464                  | L               |
| CLUSTER5182 | helix-turn-helix domain-containing protein                  | COG3835,COG2508          | T,K             |
| CLUSTER5179 | NADPH-dependent oxidoreductase                              | COG0655,COG0431,COG1182  | I,R             |
| CLUSTER5174 | SDR family NADP-dependent oxidoreductase                    | COG3967,COG4221,COG0623, | R,M,I           |
| CLUSTER5164 | helix-turn-helix domain-containing protein                  | COG2207,COG2169,COG4977, | R,F,K           |
| CLUSTER5163 | trypsin-like peptidase domain-containing protein            | COG0265,COG3480          | O,T             |
| CLUSTER5151 | GNAT family N-acetyltransferase                             | COG0456,COG0454,COG1247, | K,J,M,R         |
| CLUSTER5150 | metal-sensitive transcriptional regulator                   | COG1937                  | S               |
| CLUSTER5145 | helix-turn-helix transcriptional regulator                  | COG3655                  | K               |
| CLUSTER5136 | alpha/beta hydrolase                                        | COG0596,COG2267,COG1075  | R,I             |
| CLUSTER5135 | NADP/FAD-dependent oxidoreductase                           | COG0654,COG0665,COG1053, | P,R,S,H,C,Q,E,O |
| CLUSTER5132 | TetR/AcrR family transcriptional regulator                  | COG3226,COG1309          | S,K             |
| CLUSTER5129 | alpha/beta fold hydrolase                                   | COG0596                  | R               |
| CLUSTER5127 | type 1 glutamine amidotransferase domain-containing protein | COG0693,COG3155          | Q,R             |
| CLUSTER5010 | ATP-binding protein                                         | COG1106,COG4637,COG1195, | L,R             |
| CLUSTER5008 | amidohydrolase family protein                               | COG2159                  | R               |

|             |                                                                            |                          |         |
|-------------|----------------------------------------------------------------------------|--------------------------|---------|
| CLUSTER5001 | alpha/beta fold hydrolase                                                  | COG1506,COG1073,COG0412, | Q,R,E   |
| CLUSTER4872 | GAF domain-containing protein                                              | COG2203,COG3290,COG3275, | K,T,H   |
| CLUSTER4859 | helix-turn-helix domain-containing protein                                 | COG4977,COG1205,COG2207, | F,K,R   |
| CLUSTER4855 | NAD-dependent epimerase/dehydratase family protein                         | COG2910,COG1090,COG3268, | R,M,S,E |
| CLUSTER4851 | helix-turn-helix domain-containing protein                                 | COG1349                  | K       |
| CLUSTER4843 | ACR3 family arsenite efflux transporter                                    | COG0798                  | P       |
| CLUSTER4842 | multicopper oxidase family protein                                         | COG2132                  | Q       |
| CLUSTER4831 | DUF433 domain-containing protein                                           | COG2442                  | S       |
| CLUSTER4830 | enoyl-CoA hydratase-related protein                                        | COG0447,COG1024          | H,I     |
| CLUSTER4829 | LLM class flavin-dependent oxidoreductase                                  | COG2141                  | C       |
| CLUSTER4828 | MCE family protein                                                         | COG4372,COG0840,COG1511, | N,S,Q   |
| CLUSTER4826 | type II toxin-antitoxin system RelE/ParE family toxin                      | COG3549                  | R       |
| CLUSTER4823 | acyl-CoA/acyl-ACP dehydrogenase                                            | COG1960                  | I       |
| CLUSTER4806 | allophanate hydrolase                                                      | COG0154                  | J       |
| CLUSTER4671 | YciI family protein                                                        | COG2350                  | S       |
| CLUSTER4669 | TetR/AcrR family transcriptional regulator                                 | COG1395,COG1309          | K       |
| CLUSTER4659 | AraC family transcriptional regulator                                      | COG2169,COG2207,COG4977  | F,K     |
| CLUSTER4633 | GNAT family protein                                                        | COG1670                  | J       |
| CLUSTER4630 | transporter substrate-binding protein                                      | COG0683                  | E       |
| CLUSTER4625 | DUF5615 family PIN-like protein                                            | COG4634,COG1656          | S       |
| CLUSTER4624 | PaaX family transcriptional regulator C-terminal domain-containing protein | COG3327                  | K       |
| CLUSTER4623 | 14-dihydroxy-2-naphthoyl-CoA synthase                                      | COG1024,COG0616,COG0447  | I,O,H   |
| CLUSTER4622 | MCE family protein                                                         | COG1463                  | Q       |
| CLUSTER4621 | HigA family addiction module antitoxin                                     | COG5499,COG3093          | K,R     |
| CLUSTER4618 | amino acid--[acyl-carrier-protein] ligase                                  | COG4302,COG0172          | E,J     |
| CLUSTER4475 | SulP family inorganic anion transporter                                    | COG2233,COG0659,COG1366  | P,F,T   |
| CLUSTER4468 | response regulator                                                         | COG2204,COG3437,COG2201, | N,T,K   |
| CLUSTER4442 | organomercurial lyase MerB                                                 | #                        | #       |
| CLUSTER4424 | 4-hydroxy-2-oxovalerate aldolase                                           | COG1038,COG5016,COG0119  | E,C     |
| CLUSTER4423 | 3-oxoacyl-ACP reductase FabG                                               | COG0300,COG0451,COG0623, | R,M,I   |
| CLUSTER4422 | MCE family protein                                                         | COG1463,COG4192          | Q,T     |



|             |                                                                                                                     |                          |             |
|-------------|---------------------------------------------------------------------------------------------------------------------|--------------------------|-------------|
| CLUSTER4420 | GntR family transcriptional regulator                                                                               | COG3355,COG1725,COG1167, | K           |
| CLUSTER4263 | EamA family transporter                                                                                             | COG2510,COG0697,COG5006  | S,G,R       |
| CLUSTER4260 | GAP family protein                                                                                                  | #                        | #           |
| CLUSTER4254 | serine hydrolase                                                                                                    | COG1680                  | V           |
| CLUSTER4245 | ABC transporter permease                                                                                            | COG1172,COG4603,COG1079, | E,R,G       |
| CLUSTER4236 | LA2681 family HEPN domain-containing protein                                                                        | #                        | #           |
| CLUSTER4225 | mercuryII reductase                                                                                                 | COG0493,COG1251,COG0446, | C,H,R,E,O   |
| CLUSTER4213 | site-specific integrase                                                                                             | COG0582,COG4973          | L           |
| CLUSTER4205 | acetaldehyde dehydrogenase acetylating<br>acetyl-CoA hydrolase/transferase C-terminal domain-<br>containing protein | COG1063,COG0673,COG0287, | Q,R,E       |
| CLUSTER4204 |                                                                                                                     | COG3051,COG0427,COG1349  | K,C         |
| CLUSTER4203 | MlaD family protein                                                                                                 | COG3008,COG1463          | Q,R         |
| CLUSTER4202 | UvrD-helicase domain-containing protein                                                                             | COG1074,COG3973,COG0210  | L,R         |
| CLUSTER4199 | helix-turn-helix domain containing protein                                                                          | COG1309                  | K           |
| CLUSTER4198 | 3-oxoacyl-ACP reductase FabG                                                                                        | COG0300,COG0451,COG1028, | I,R,M       |
| CLUSTER4190 | DNA-binding protein                                                                                                 | #                        | #           |
| CLUSTER4041 | fumarylacetoacetate hydrolase family protein                                                                        | COG3970,COG0179          | R,Q         |
| CLUSTER4019 | NADP/FAD-dependent oxidoreductase                                                                                   | COG0654                  | H           |
| CLUSTER4009 | heavy metal-responsive transcriptional regulator                                                                    | COG0789,COG2452          | L,K         |
| CLUSTER4002 | site-specific integrase                                                                                             | COG0582,COG4974          | L           |
| CLUSTER3996 | DUF559 domain-containing protein                                                                                    | COG2852                  | S           |
| CLUSTER3995 | DUF262 domain-containing protein                                                                                    | COG1479                  | S           |
| CLUSTER3852 | TIGR02391 family protein                                                                                            | #                        | #           |
| CLUSTER3828 | M23 family metallopeptidase                                                                                         | COG4942,COG0739          | D,M         |
| CLUSTER3819 | S8 family peptidase                                                                                                 | COG1404                  | O           |
| CLUSTER3817 | MerR family transcriptional regulator                                                                               | COG0789                  | K           |
| CLUSTER3811 | AMP-binding protein                                                                                                 | COG1022,COG1021,COG1541, | Q,H,I       |
| CLUSTER3810 | FAD-dependent oxidoreductase                                                                                        | COG0644,COG0492,COG3634, | P,R,H,C,O   |
| CLUSTER3809 | MaoC family dehydratase N-terminal domain-containing<br>protein                                                     | COG2030,COG3777          | S,I         |
| CLUSTER3808 | FAD-dependent oxidoreductase                                                                                        | COG1249,COG3380,COG1252, | R,C,Q,E,S,O |
| CLUSTER3806 | SGNH/GDSL hydrolase family protein                                                                                  | COG2755                  | E           |

|             |                                                      |                          |                           |
|-------------|------------------------------------------------------|--------------------------|---------------------------|
| CLUSTER3798 | helix-turn-helix domain-containing protein           | COG2169,COG2207,COG4977  | F,K                       |
| CLUSTER3795 | helix-turn-helix domain-containing protein           | COG3464                  | L                         |
| CLUSTER3794 | LysR family transcriptional regulator                | COG0583,COG1321          | K                         |
| CLUSTER3793 | AAA family ATPase                                    | COG0210,COG3973,COG1074  | R,L                       |
| CLUSTER3652 | undecaprenyl-diphosphate phosphatase                 | COG1968                  | V                         |
| CLUSTER3641 | toxin glutamine deamidase domain-containing protein  | #                        | #                         |
|             | AraC family transcriptional regulator ligand-binding |                          |                           |
| CLUSTER3630 | domain-containing protein                            | COG4977,COG2207,COG2169, | F,K                       |
| CLUSTER3626 | c-type cytochrome biogenesis protein CcsB            | COG4137,COG1138,COG0755  | O,R                       |
| CLUSTER3609 | hotdog domain-containing protein                     | COG2050,COG1607          | I,Q                       |
| CLUSTER3608 | extradiol ring-cleavage dioxygenase                  | #                        | #                         |
| CLUSTER3607 | MaoC/PaaZ C-terminal domain-containing protein       | COG2030,COG3777          | S,I                       |
| CLUSTER3604 | oligosaccharide repeat unit polymerase               | #                        | #                         |
| CLUSTER3589 | class A beta-lactamase-related serine hydrolase      | COG2367,COG2027,COG0768, | M,V                       |
| CLUSTER3588 | 3-5 exonuclease                                      | COG0210,COG3972,COG1074, | L,R                       |
| CLUSTER3447 | DedA family protein                                  | COG0586                  | S                         |
| CLUSTER3446 | 6-carboxytetrahydropterin synthase QueD              | COG0720                  | H                         |
| CLUSTER3432 | GMC family oxidoreductase                            | COG1053,COG1249,COG0644, | E,Q,C                     |
| CLUSTER3427 | cytochrome c biogenesis protein ResB                 | COG1333                  | O                         |
| CLUSTER3424 | DUF222 domain-containing protein                     | #                        | #                         |
| CLUSTER3417 | SDR family NADP-dependent oxidoreductase             | COG0300,COG1028,COG0623, | R,M,I                     |
| CLUSTER3416 | IclR family transcriptional regulator                | COG2512,COG1522,COG4190, | K,S                       |
| CLUSTER3415 | zinc-binding dehydrogenase                           | COG1064,COG2130,COG0604, | R,C,E                     |
| CLUSTER3414 | CoA ester lyase                                      | COG2301                  | G                         |
| CLUSTER3410 | DUF4012 domain-containing protein                    | #                        | #                         |
| CLUSTER3402 | FUSC family protein                                  | COG1289,COG4129          | S                         |
|             | penicillin-binding transpeptidase domain-containing  |                          |                           |
| CLUSTER3397 | protein                                              | COG0768,COG4953,COG5009, | M                         |
| CLUSTER3396 | DEAD/DEAH box helicase                               | COG1201,COG1061,COG0513, | K,L,R                     |
| CLUSTER3256 | ATP-binding cassette domain-containing protein       | COG4152,COG1117,COG4586, | F,P,V,G,R,L,N,D,Q,H,C,O,E |
| CLUSTER3255 | 7-carboxy-7-deazaguanine synthase                    | COG1180,COG2896,COG0602  | H,O                       |
| CLUSTER3239 | FAD-dependent oxidoreductase                         | COG4529,COG0492,COG1232, | H,E,S,O                   |

|             |                                                      |                          |         |
|-------------|------------------------------------------------------|--------------------------|---------|
| CLUSTER3237 | cytochrome c biogenesis protein ResB                 | COG1333                  | O       |
| CLUSTER3231 | ImmA/IrrE family metallo-endopeptidase               | COG2856                  | E       |
|             | PaaX family transcriptional regulator C-terminal     |                          |         |
| CLUSTER3226 | domain-containing protein                            | COG3327                  | K       |
| CLUSTER3225 | amidohydrolase family protein                        | COG2159                  | R       |
| CLUSTER3224 | hotdog fold thioesterase                             | COG2050                  | Q       |
| CLUSTER3223 | MaoC family dehydratase                              | COG2030                  | I       |
| CLUSTER3221 | glycosyltransferase family 4 protein                 | COG0438                  | M       |
| CLUSTER3214 | MarR family transcriptional regulator                | COG1378,COG1846,COG1510, | K,P,S   |
| CLUSTER3210 | restriction endonuclease subunit M                   | #                        | #       |
| CLUSTER3073 | ABC transporter permease subunit                     | COG1173,COG4171,COG4239  | V,R,E   |
| CLUSTER3058 | DUF4873 domain-containing protein                    | #                        | #       |
|             | twin-arginine translocation signal domain-containing |                          |         |
| CLUSTER3056 | protein                                              | COG4263                  | C       |
| CLUSTER3048 | 2-hydroxyacyl-CoA dehydratase family protein         | COG1775                  | E       |
| CLUSTER3047 | NADP/FAD-dependent oxidoreductase                    | COG1232,COG0654          | H       |
| CLUSTER3046 | AMP-binding protein                                  | COG0318,COG1020,COG1022, | I,Q     |
| CLUSTER3045 | AMP-binding protein                                  | COG0365,COG1021,COG1022, | I,Q     |
| CLUSTER3043 | DapH/DapD/GlmU-related protein                       | COG1207,COG0110,COG1044, | E,M,R   |
|             | AraC family transcriptional regulator N-terminal     |                          |         |
| CLUSTER3038 | domain-containing protein                            | COG2207,COG4977,COG4753  | K,T     |
| CLUSTER3036 | MFS transporter                                      | COG2211,COG2814,COG0477, | G       |
| CLUSTER3025 | DEAD/DEAH box helicase                               | COG4096,COG0553,COG1061, | K,L,R,V |
| CLUSTER2912 | TetR/AcrR family transcriptional regulator           | COG1309                  | K       |
| CLUSTER2905 | ABC transporter permease                             | COG1173,COG4168,COG0601  | V,E     |
| CLUSTER2898 | polysaccharide pyruvyl transferase family protein    | COG5039                  | G       |
| CLUSTER2895 | alpha/beta hydrolase                                 | COG0596,COG3319,COG2267, | I,E,Q,R |
| CLUSTER2890 | diiron oxygenase                                     | #                        | #       |
| CLUSTER2884 | multiubiquitin domain-containing protein             | #                        | #       |
| CLUSTER2882 | DUF4345 domain-containing protein                    | #                        | #       |
| CLUSTER2881 | 2-hydroxyacyl-CoA dehydratase family protein         | COG2441,COG1775          | E,C     |
| CLUSTER2880 | alpha/beta hydrolase                                 | COG1506,COG1647,COG0596, | R,I,E   |

|             |                                                                                 |                          |                   |
|-------------|---------------------------------------------------------------------------------|--------------------------|-------------------|
| CLUSTER2879 | aldehyde dehydrogenase                                                          | COG1012,COG4230          | C                 |
| CLUSTER2876 | endo-13-alpha-glucanase family glycosylhydrolase                                | #                        | #                 |
| CLUSTER2875 | polysaccharide biosynthesis tyrosine autokinase                                 | COG0541,COG0003,COG3944, | P,U,D,M,T         |
| CLUSTER2864 | Lrp/AsnC family transcriptional regulator                                       | COG1522                  | K                 |
| CLUSTER2862 | DUF1998 domain-containing protein                                               | #                        | #                 |
| CLUSTER2744 | TetR/AcrR family transcriptional regulator                                      | COG1309,COG1193          | L,K               |
| CLUSTER2743 | ABC transporter substrate-binding protein                                       | COG4533,COG4166,COG0747  | E,R               |
| CLUSTER2742 | PfkB family carbohydrate kinase                                                 | COG3613,COG0524,COG1105  | F,G               |
| CLUSTER2738 | NADP-dependent oxidoreductase                                                   | COG1250,COG0362,COG1893, | H,C,M,E,R,G,S,I,P |
| CLUSTER2729 | TetR/AcrR family transcriptional regulator                                      | COG1309                  | K                 |
| CLUSTER2728 | apolipoprotein N-acyltransferase                                                | COG0388,COG0815          | R,M               |
| CLUSTER2726 | beta-ketoacyl synthase N-terminal-like domain-containing protein                | COG0304,COG3321          | Q,I               |
| CLUSTER2724 | TetR/AcrR family transcriptional regulator                                      | COG1309                  | K                 |
| CLUSTER2722 | acyl-CoA dehydratase activase                                                   | COG1940,COG0068,COG1070, | G,I,O,K           |
| CLUSTER2721 | AMP-binding protein                                                             | COG1022,COG0365,COG1021, | I,Q               |
| CLUSTER2720 | LuxR C-terminal-related transcriptional regulator                               | COG2197,COG4566,COG2771, | K,T               |
| CLUSTER2717 | glycosyltransferase                                                             | COG1215,COG1216          | M,R               |
| CLUSTER2705 | helicase-related protein                                                        | #                        | #                 |
| CLUSTER2594 | putative quinol monooxygenase                                                   | COG1359                  | S                 |
| CLUSTER2592 | TauD/TfdA family dioxygenase                                                    | COG2175                  | Q                 |
| CLUSTER2591 | 7-cyano-7-deazaguanine synthase                                                 | COG0367,COG0603          | E,R               |
| CLUSTER2584 | type IV toxin-antitoxin system AbiEi family antitoxin domain-containing protein | COG2852                  | S                 |
| CLUSTER2580 | fluoride efflux transporter CrcB                                                | COG0239                  | D                 |
| CLUSTER2567 | ThiF family adenylyltransferase                                                 | COG1179,COG0476          | H                 |
| CLUSTER2561 | SDR family NADP-dependent oxidoreductase                                        | COG3967,COG4221,COG0169, | R,M,E,I           |
| CLUSTER2560 | LuxR C-terminal-related transcriptional regulator                               | COG1595,COG1522,COG2909, | K,T               |
| CLUSTER2555 | GDP-mannose 46-dehydratase                                                      | COG0702,COG0451,COG1088, | M                 |
| CLUSTER2552 | hydrolase                                                                       | COG0388,COG0815          | R,M               |
| CLUSTER2548 | AAA family ATPase                                                               | COG0210,COG1074          | L                 |
| CLUSTER2428 | NADP/FAD-dependent oxidoreductase                                               | COG1233,COG1148,COG1249, | P,S,R,E,O,C,H,Q   |

|             |                                                |                          |                         |
|-------------|------------------------------------------------|--------------------------|-------------------------|
| CLUSTER2426 | ornithine cyclodeaminase family protein        | COG2423                  | E                       |
| CLUSTER2425 | nitroreductase family protein                  | #                        | #                       |
| CLUSTER2418 | glycosyltransferase family 2 protein           | COG0463,COG1215,COG1216  | R,M                     |
| CLUSTER2415 | SRPBCC domain-containing protein               | COG3832                  | S                       |
| CLUSTER2411 | cytochrome c biogenesis protein CcdA           | COG4232,COG2194,COG0785  | R,O                     |
| CLUSTER2408 | MerR family transcriptional regulator          | COG0789                  | K                       |
| CLUSTER2407 | Fis family transcriptional regulator           | #                        | #                       |
| CLUSTER2403 | tyrosine-protein phosphatase                   | COG2365,COG5599,COG2453  | T                       |
| CLUSTER2402 | acyl-CoA/acyl-ACP dehydrogenase                | COG1960                  | I                       |
| CLUSTER2401 | 2Fe-2S iron-sulfur cluster-binding protein     | COG0633,COG3894,COG2871  | C,R                     |
| CLUSTER2399 | TetR/AcrR family transcriptional regulator     | COG1309,COG2207          | K                       |
| CLUSTER2398 | acyl-CoA/acyl-ACP dehydrogenase                | COG1960                  | I                       |
| CLUSTER2397 | GDP-L-fucose synthase                          | COG1088,COG1087,COG0451, | M                       |
| CLUSTER2393 | ester cyclase                                  | COG5485                  | R                       |
| CLUSTER2383 | very short patch repair endonuclease           | COG3727,COG2852          | L,S                     |
| CLUSTER2258 | helix-turn-helix domain-containing protein     | #                        | #                       |
| CLUSTER2256 | LysR family transcriptional regulator          | COG2522,COG0583          | R,K                     |
| CLUSTER2254 | alanine racemase                               | COG1166,COG0019,COG0787  | M,E                     |
| CLUSTER2241 | ATP-binding cassette domain-containing protein | COG4161,COG3845,COG2401, | V,G,R,L,P,H,C,Q,T,E,O,D |
| CLUSTER2230 | TlpA disulfide reductase family protein        | COG0526,COG3118          | O                       |
| CLUSTER2224 | helix-turn-helix transcriptional regulator     | COG3655                  | K                       |
| CLUSTER2216 | Paal family thioesterase                       | COG2050                  | Q                       |
| CLUSTER2215 | MarR family transcriptional regulator          | COG1846,COG1321          | K                       |
| CLUSTER2214 | cytochrome P450                                | COG2124                  | Q                       |
| CLUSTER2209 | Rrf2 family transcriptional regulator          | COG1959,COG1725          | K                       |
| CLUSTER2208 | YdcF family protein                            | COG1434                  | S                       |
| CLUSTER2207 | sialate O-acetyltransferase                    | COG1506,COG0412          | E,Q                     |
| CLUSTER2206 | histidinol dehydrogenase                       | COG0141                  | E                       |
| CLUSTER2196 | phosphoribosyltransferase                      | COG0503,COG1040,COG0461, | F,R                     |
| CLUSTER2068 | FAD-dependent monooxygenase                    | COG0644,COG1148,COG0493, | S,E,H,R,C,Q             |
| CLUSTER2067 | cysteine synthase family protein               | COG1171,COG0031,COG0498  | E                       |
| CLUSTER2035 | tyrosine-type recombinase/integrase            | COG4973,COG0582,COG4974  | L                       |

|             |                                                               |                          |                 |
|-------------|---------------------------------------------------------------|--------------------------|-----------------|
| CLUSTER2026 | CoA transferase                                               | COG1804                  | C               |
| CLUSTER2025 | FAD-dependent oxidoreductase                                  | COG3634,COG0492,COG0569, | P,C,R,E,O       |
| CLUSTER2020 | acyl-CoA/acyl-ACP dehydrogenase                               | COG1960                  | I               |
| CLUSTER2019 | class I SAM-dependent methyltransferase                       | COG4106,COG2227,COG0500  | H,R,Q           |
| CLUSTER2016 | ABC transporter substrate-binding protein                     | COG1879,COG4213          | G               |
| CLUSTER2002 | DNA-processing protein DprA                                   | COG0758                  | L               |
| CLUSTER1992 | ATP-binding protein                                           | COG3899                  | R               |
| CLUSTER1982 | linear amide C-N hydrolase                                    | COG3049                  | M               |
| CLUSTER1969 | metalloregulator ArsR/SmtB family transcription factor        | COG2345,COG3355,COG1846, | K,S             |
| CLUSTER1968 | heavy metal translocating P-type ATPase                       | COG4087,COG2217,COG1778, | E,R,G,P         |
| CLUSTER1964 | HAD-IA family hydrolase                                       | COG0546,COG0637          | R               |
| CLUSTER1963 | tyrosine-type recombinase/integrase                           | COG4974,COG0582,COG4973  | L               |
| CLUSTER1951 | nuclear transport factor 2 family protein                     | #                        | #               |
| CLUSTER1944 | histidinol dehydrogenase                                      | COG0141                  | E               |
| CLUSTER1941 | MarR family transcriptional regulator                         | COG1733,COG1846          | K               |
| CLUSTER1819 | amidohydrolase family protein                                 | COG3964,COG0044,COG3653, | R,G,Q,P,F       |
| CLUSTER1812 | helix-turn-helix domain-containing protein                    | #                        | #               |
| CLUSTER1796 | ATP-binding cassette domain-containing protein                | COG4988,COG4555,COG0410, | O,E,Q,C,V,R,G,P |
| CLUSTER1781 | NADP-binding domain-containing protein                        | COG2072,COG1249,COG1233, | O,E,S,Q,R,C,P   |
| CLUSTER1780 | YdhK family protein                                           | #                        | #               |
| CLUSTER1768 | phosphotransferase family protein                             | COG2334,COG3173          | R               |
| CLUSTER1767 | NDMA-dependent alcohol dehydrogenase                          | COG0604,COG0169,COG1063, | R,C,E           |
| CLUSTER1761 | SDR family NADP-dependent oxidoreductase                      | COG0300,COG0623,COG0451, | I,R,M           |
| CLUSTER1756 | DUF202 domain-containing protein                              | COG2149                  | S               |
| CLUSTER1752 | cold shock domain-containing protein                          | #                        | #               |
| CLUSTER1751 | oxidoreductase C-terminal domain-containing protein           | #                        | #               |
| CLUSTER1637 | MarR family winged helix-turn-helix transcriptional regulator | COG1846                  | K               |
| CLUSTER1619 | YhgE/Pip domain-containing protein                            | COG1511,COG1463,COG0842, | N,S,Q,G,V       |
| CLUSTER1607 | NADP/FAD-dependent oxidoreductase                             | COG0438,COG1252,COG2072, | O,C,H,Q,M,S,R,P |
| CLUSTER1606 | NADP/FAD-dependent oxidoreductase                             | COG2072,COG0644,COG0492, | H,C,Q,E,O,P     |
| CLUSTER1592 | AMP-binding protein                                           | COG1022,COG1021,COG1541, | Q,H,I           |



|             |                                                         |                          |       |
|-------------|---------------------------------------------------------|--------------------------|-------|
| CLUSTER1591 | enoyl-CoA hydratase-related protein                     | COG1024,COG0447          | H,I   |
| CLUSTER1590 | ABC transporter permease                                | COG0767                  | Q     |
| CLUSTER1589 | LysR family substrate-binding domain-containing protein | COG0583                  | K     |
| CLUSTER1587 | holo-ACP synthase                                       | COG0736                  | I     |
| CLUSTER1583 | aldolase/citrate lyase family protein                   | COG3836,COG2301          | G     |
| CLUSTER1570 | AraC family transcriptional regulator                   | COG4753,COG2169,COG2207, | K,F,T |
| CLUSTER1441 | DUF5593 domain-containing protein                       | #                        | #     |
| CLUSTER1434 | enoyl-CoA hydratase/isomerase family protein            | COG0447,COG1024          | H,I   |
| CLUSTER1416 | MFS transporter                                         | COG2814,COG0477,COG2807, | G,P   |
| CLUSTER1415 | heavy metal translocating P-type ATPase                 | COG0474,COG0561,COG2608, | R,E,P |
| CLUSTER1402 | acyl-CoA/acyl-ACP dehydrogenase                         | COG1960                  | I     |
| CLUSTER1401 | enoyl-CoA hydratase-related protein                     | COG1024,COG0447          | H,I   |
| CLUSTER1400 | ABC transporter permease                                | COG0767                  | Q     |
| CLUSTER1398 | LysR family transcriptional regulator                   | COG0583                  | K     |
| CLUSTER1389 | acyltransferase                                         | COG1835                  | I     |
| CLUSTER1387 | WhiB family transcriptional regulator                   | #                        | #     |
| CLUSTER1384 | DUF1942 domain-containing protein                       | #                        | #     |
| CLUSTER1251 | Lrp/AsnC family transcriptional regulator               | COG1522                  | K     |
| CLUSTER1248 | EthD domain-containing protein                          | #                        | #     |
| CLUSTER1227 | low molecular weight phosphatase family protein         | COG0394                  | T     |
| CLUSTER1226 | heavy metal-associated domain-containing protein        | COG2217,COG2608          | P     |
| CLUSTER1214 | zinc ribbon domain-containing protein                   | #                        | #     |
| CLUSTER1210 | AMP-binding protein                                     | COG1022,COG1021,COG0365, | I,Q   |
| CLUSTER1209 | enoyl-CoA hydratase-related protein                     | COG0447,COG1024          | I,H   |
| CLUSTER1208 | MCE family protein                                      | COG1463                  | Q     |
| CLUSTER1203 | DUF1839 family protein                                  | #                        | #     |
| CLUSTER1192 | GntR family transcriptional regulator                   | COG1167,COG1725,COG2186, | K     |
| CLUSTER1066 | DUF4209 domain-containing protein                       | #                        | #     |
| CLUSTER1065 | ester cyclase                                           | COG3631,COG5485          | R     |
| CLUSTER1058 | LuxR C-terminal-related transcriptional regulator       | COG2197,COG4566,COG2771, | K,T   |
| CLUSTER1055 | AraC family transcriptional regulator                   | COG2207,COG4977          | K     |

|             |                                                        |                          |         |
|-------------|--------------------------------------------------------|--------------------------|---------|
| CLUSTER1041 | metalloregulator ArsR/SmtB family transcription factor | COG0640,COG4189,COG0394  | K,T     |
| CLUSTER1022 | NUDIX domain-containing protein                        | #                        | #       |
| CLUSTER1021 | FadR/GntR family transcriptional regulator             | COG1725,COG2186,COG1802, | K       |
| CLUSTER1020 | MlaD family protein                                    | COG1463                  | Q       |
| CLUSTER1015 | acyl carrier protein                                   | COG0236                  | I       |
| CLUSTER1013 | 23-butanediol dehydrogenase                            | COG0604,COG0169,COG2072, | E,R,C,P |
| CLUSTER1006 | DUF2742 domain-containing protein                      | #                        | #       |
| CLUSTER1003 | cysteine hydrolase                                     | COG1335,COG1535          | Q       |
| CLUSTER0995 | fumarylacetoacetate hydrolase family protein           | COG3971                  | Q       |
| CLUSTER0994 | thiolase family protein                                | COG0183                  | I       |
|             | TetR/AcrR family transcriptional regulator C-terminal  |                          |         |
| CLUSTER0990 | ligand-binding domain-containing protein               | #                        | #       |
| CLUSTER0989 | sugar transferase                                      | COG2148,COG1086          | M       |
| CLUSTER0988 | phosphotransferase                                     | COG1718,COG2334,COG3173  | R,T     |
| CLUSTER0977 | helix-turn-helix transcriptional regulator             | #                        | #       |
| CLUSTER0972 | PD-D/EXK nuclease family protein                       | #                        | #       |
| CLUSTER0774 | permease                                               | COG0701                  | R       |
| CLUSTER0766 | DNA cytosine methyltransferase                         | COG0270                  | L       |
| CLUSTER0757 | helix-turn-helix domain containing protein             | COG1309                  | K       |
| CLUSTER0756 | aromatic-ring-hydroxylating dioxygenase subunit beta   | COG5517                  | Q       |
| CLUSTER0755 | SDR family NADP-dependent oxidoreductase               | COG4221,COG3967,COG0300, | M,R,I   |
| CLUSTER0748 | APC family permease                                    | COG1113,COG0531          | E       |
| CLUSTER0736 | site-specific integrase                                | COG4973,COG4974,COG0582  | L       |
| CLUSTER0548 | helix-turn-helix domain-containing protein             | COG5484,COG3415          | L,S     |
| CLUSTER0523 | class I SAM-dependent methyltransferase                | COG0703,COG5624          | E,K     |
| CLUSTER0495 | fatty acid--CoA ligase family protein                  | COG0318,COG1020,COG1022, | Q,H,I   |
| CLUSTER0494 | SDR family oxidoreductase                              | COG3967,COG4982,COG4221, | E,I,R,M |
| CLUSTER0493 | acyl-CoA/acyl-ACP dehydrogenase                        | COG1960                  | I       |
| CLUSTER0492 | cytochrome P450                                        | COG2124                  | Q       |
|             | aminotransferase class III-fold pyridoxal phosphate-   |                          |         |
| CLUSTER0485 | dependent enzyme                                       | COG0160,COG4992,COG0161, | E,H     |
| CLUSTER0482 | helix-turn-helix domain-containing protein             | COG1733                  | K       |

|             |                                                     |                          |       |
|-------------|-----------------------------------------------------|--------------------------|-------|
| CLUSTER0243 | SDR family oxidoreductase                           | COG0300,COG1028,COG0623, | M,R,I |
| CLUSTER0238 | signal peptidase II                                 | COG0597                  | M     |
| CLUSTER0218 | TetR family transcriptional regulator               | COG1309                  | K     |
| CLUSTER0217 | dienelactone hydrolase family protein               | COG0412                  | Q     |
| CLUSTER0216 | acyl-CoA dehydrogenase family protein               | COG1960                  | I     |
| CLUSTER0215 | aldehyde dehydrogenase                              | COG1012,COG4230          | C     |
| CLUSTER0209 | glycosyltransferase                                 | COG0763,COG1819,COG0297, | G,M   |
| CLUSTER0205 | zinc-dependent alcohol dehydrogenase family protein | COG1062,COG1063,COG0604, | E,R,C |
| CLUSTER0193 | DNA cytosine methyltransferase                      | COG0270                  | L     |

**Figure S5.** Distribution of switched noncoding intergenic regions in the genome of *G. polyisoprenivorans* strain 135. NcIGRs have numbers corresponding to the numbers of genes lying downstream of these regions. The color scheme is as follows: **yellow** indicates IGRs lying between forward co-oriented genes; **green** indicates IGRs lying between reverse co-oriented genes; **cyan** indicates IGRs whose gene environment is transcribed divergently (in different directions); **gray** indicates IGRs whose gene environment is transcribed convergently (toward).

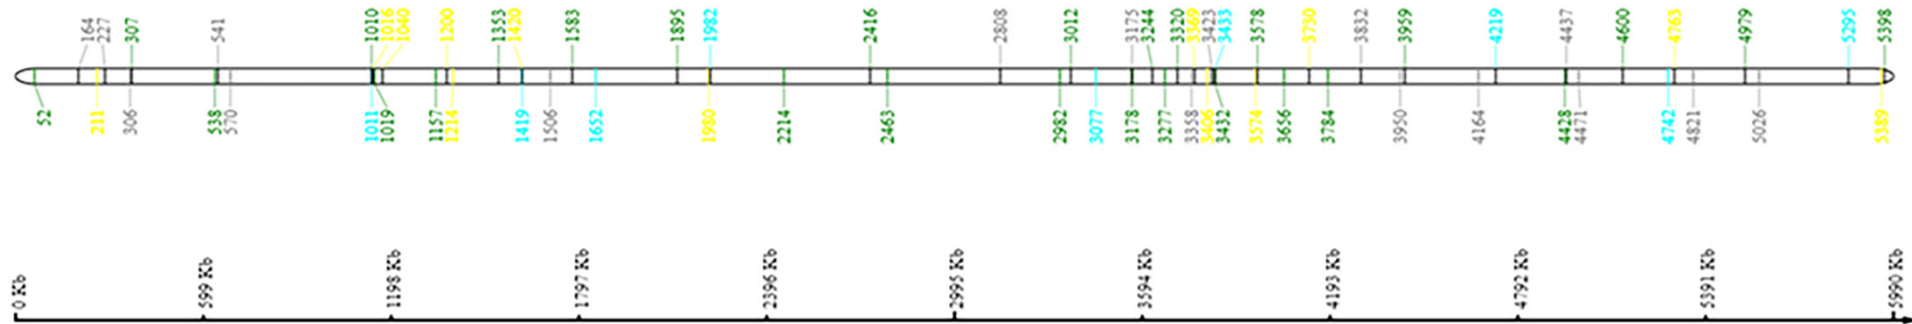

Schematic representation of the chromosome of *G. polyisoprenivorans* 135

**Table S2.** Occurrence of genes (a) extradiol ring-cleavage dioxygenase (WCB38962.1) and (b) aromatic ring-hydroxylating dioxygenase subunit alpha (WCB38965.1) in *Actinobacteria* genomes. The percent identity threshold was taken > 69%. Here, percent identity is to be understood as the percent of nucleotides that are identical between the query and database sequences. The databases nr/nt and WGS were used for analysis.

|     | <b>Genbank<br/>acc. number</b> | <b>Strain name</b>                                                        | <b>Query cover,<br/>%</b> | <b>Percent<br/>identity, %</b> |
|-----|--------------------------------|---------------------------------------------------------------------------|---------------------------|--------------------------------|
| (a) | CP045809.1                     | <i>Gordonia pseudamarae</i> strain CON9 chromosome                        | 99                        | 79.25                          |
|     | CP045806.1                     | <i>Gordonia pseudamarae</i> strain BEN371<br>chromosome                   | 99                        | 79.25                          |
|     | CP053928.1                     | <i>Nocardioides</i> sp. WS12 chromosome                                   | 99                        | 76.40                          |
|     | CP089312.1                     | <i>Streptomyces</i> sp. GQFP chromosome                                   | 98                        | 72.91                          |
|     | CP015203.1                     | <i>Rhodococcus</i> sp. 008 plasmid pR8L1                                  | 98                        | 72.54                          |
|     | CP096567.1                     | <i>Rhodococcus qingshengii</i> JCM 15477 strain djl-6<br>plasmid pdjl-6-4 | 98                        | 72.54                          |
|     | CP054208.1                     | <i>Rhodococcus qingshengii</i> strain CX-1 plasmid<br>unnamed1            | 98                        | 72.54                          |
|     | CP044283.1                     | <i>Rhodococcus erythropolis</i> strain X5 plasmid pRhX5                   | 98                        | 72.11                          |
|     | CP016353.1                     | <i>Prauserella marina</i> strain DSM 45268<br>chromosome                  | 99                        | 69.74                          |
|     | CP053564.1                     | <i>Pseudonocardia broussonetiae</i> strain Gen 01<br>chromosome           | 98                        | 69.97                          |
|     | CP012185.1                     | <i>Pseudonocardia</i> sp. EC080619-01 plasmid pBCI1-2                     | 98                        | 69.88                          |
|     | CP012182.1                     | <i>Pseudonocardia</i> sp. EC080610-09 plasmid pBCI2-1                     | 98                        | 69.88                          |
|     | CP072203.1                     | <i>Gordonia polyisoprenivorans</i> strain R9<br>chromosome                | 98                        | 69.33                          |
| (b) | CP045809.1                     | <i>Gordonia pseudamarae</i> strain CON9 chromosome                        | 97                        | 80.76                          |
|     | CP045806.1                     | <i>Gordonia pseudamarae</i> strain BEN371<br>chromosome                   | 97                        | 80.76                          |
|     | CP053928.1                     | <i>Nocardioides</i> sp. WS12 chromosome                                   | 92                        | 77.86                          |
|     | CP089312.1                     | <i>Streptomyces</i> sp. GQFP chromosome                                   | 95                        | 74.20                          |
|     | CP044283.1                     | <i>Rhodococcus erythropolis</i> strain X5 plasmid pRhX5                   | 92                        | 74.06                          |
|     | CP012185.1                     | <i>Pseudonocardia</i> sp. EC080619-01 plasmid pBCI1-2                     | 95                        | 72.95                          |
|     | CP012182.1                     | <i>Pseudonocardia</i> sp. EC080610-09 plasmid pBCI2-1                     | 95                        | 72.95                          |
|     | CP016353.1                     | <i>Prauserella marina</i> strain DSM 45268<br>chromosome                  | 93                        | 72.76                          |
|     | CP015203.1                     | <i>Rhodococcus</i> sp. 008 plasmid pR8L1                                  | 92                        | 72.21                          |
|     | CP096567.1                     | <i>Rhodococcus qingshengii</i> JCM 15477 strain djl-6<br>plasmid pdjl-6-4 | 92                        | 72.21                          |
|     | CP054208.1                     | <i>Rhodococcus qingshengii</i> strain CX-1 plasmid<br>unnamed1            | 92                        | 72.21                          |
|     | CP031414.1                     | <i>Mycolicibacterium neoaurum</i> strain HGMS2<br>chromosome              | 94                        | 70.82                          |
|     | CP011022.1                     | <i>Mycolicibacterium neoaurum</i> strain NRRL B-3805<br>chromosome        | 94                        | 70.82                          |
|     | CP006936.2                     | <i>Mycobacterium neoaurum</i> VKM Ac-1815D                                | 94                        | 70.82                          |
|     | CP072203.1                     | <i>Gordonia polyisoprenivorans</i> strain R9<br>chromosome                | 94                        | 70.41                          |
